# Supplementary material
Source: PubMed Central journal article supplement (PMC34706)
Supplement: pnas_98_13_7552__2.pdf [file pnas_98_13_7552__2.pdf]

**Table 3.** Properties of 37 isolates of Group A *Streptococcus* selected for study.

| Isolate <sup>a</sup> | Serotype | Locality | Source / Diagnosis <sup>b</sup> |
|----------------------|----------|----------|---------------------------------|
| 5005                 | M1       | Ontario  | Invasive                        |
| 7320                 | M1       | Finland  | Pharyngitis                     |
| 7638                 | M1       | Illinois | Invasive                        |
| 8520                 | M1       | Utah     | Pharyngitis                     |
| 6270                 | M2       | Texas    | Invasive                        |
| 7563                 | M2       | Illinois | Pharyngitis                     |
| 7635                 | M2       | Illinois | Invasive                        |
| 315                  | M3       | Texas    | Invasive                        |
| 6256                 | M3       | Texas    | Invasive                        |
| 7361                 | M3       | Texas    | Invasive                        |
| 7595                 | M3       | Illinois | Pharyngitis                     |
| 8580                 | M3       | Utah     | Pharyngitis                     |
| 8730                 | M3       | Texas    | Invasive                        |
| 8514                 | M4       | Utah     | Pharyngitis                     |
| 8718                 | M4       | Texas    | Invasive                        |
| 6179                 | M6       | Texas    | Invasive                        |
| 7572                 | M6       | Illinois | Pharyngitis                     |
| 8651                 | M6       | Utah     | Pharyngitis                     |
| 6166                 | M12      | Texas    | Invasive                        |
| 6866                 | M12      | Finland  | Pharyngitis                     |
| 8481                 | M12      | Utah     | Pharyngitis                     |
| 6157                 | M18      | Texas    | Invasive                        |
| 7558                 | M18      | Illinois | Pharyngitis                     |
| 7629                 | M18      | Illinois | Invasive                        |
| 7788                 | M18      | Utah     | Pharyngitis                     |
| 8512                 | M18      | Utah     | Pharyngitis                     |
| 8738                 | M18      | Texas    | Invasive                        |
| 8577                 | M22      | Utah     | Pharyngitis                     |
| 6141                 | M28      | Texas    | Invasive                        |
| 7498                 | M28      | Montana  | Invasive                        |
| 7577                 | M28      | Illinois | Pharyngitis                     |
| 8345                 | M28      | Finland  | Invasive                        |
| 8535                 | M28      | Utah     | Pharyngitis                     |
| 8557                 | M49      | Utah     | Pharyngitis                     |
| 7343                 | M75      | Texas    | Invasive                        |
| 8071                 | M75      | Utah     | Pharyngitis                     |
| 8517                 | M89      | Utah     | Pharyngitis                     |

<sup>a</sup>Musser group A *Streptococcus* (MGAS) catalogue number.

<sup>b</sup>The invasive category includes strains recovered from cases of meningitis, sepsis, cellulitis, necrotizing fasciitis, empyema, and surgical wound infection.
