# Supplementary material
Source: PubMed Central journal article supplement (PMC34706)
Supplement: pnas_98_13_7552__3.pdf [file pnas_98_13_7552__3.pdf]

Nucleotide substitutions per 100 sites

Rst967

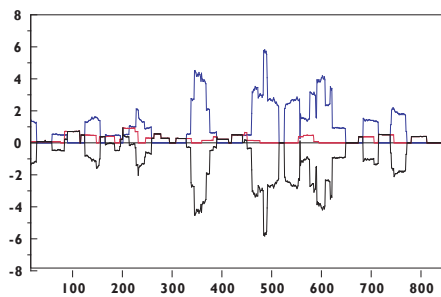

Rst299

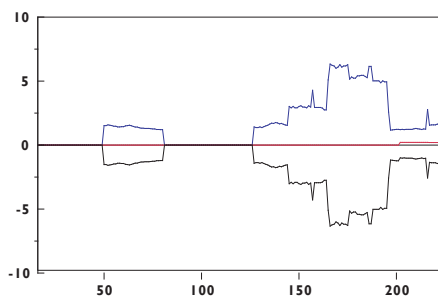

Rst872

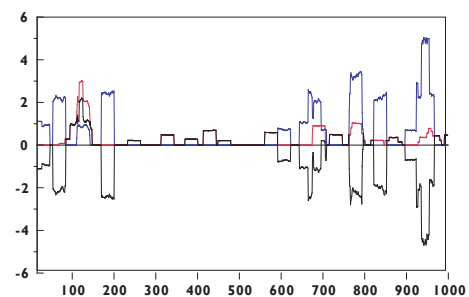

Rst90

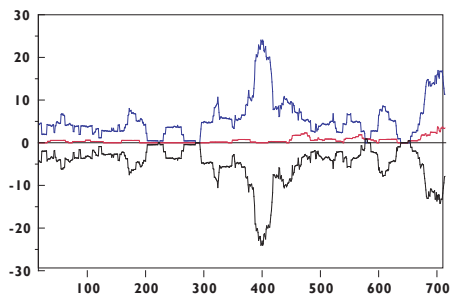

Rst1358

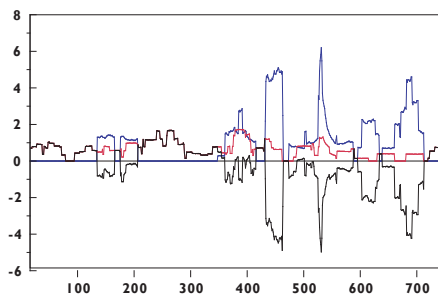

Rst84

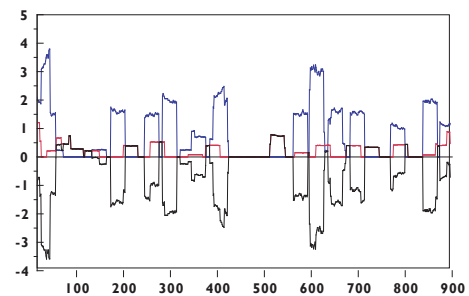

Rst197

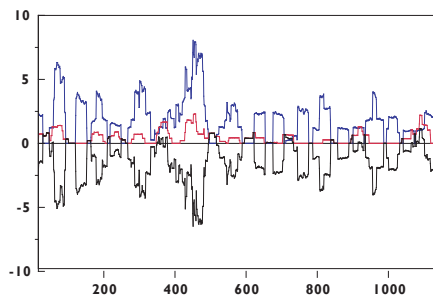

Rst1299

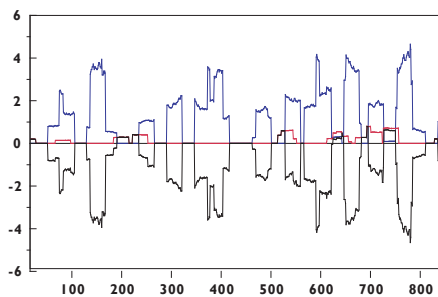

Rst1193

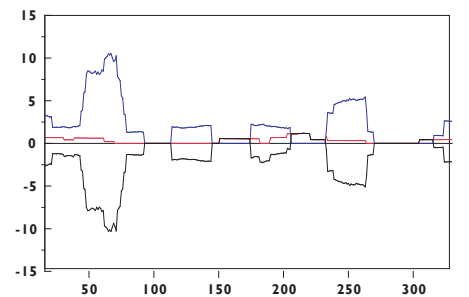

Rst298

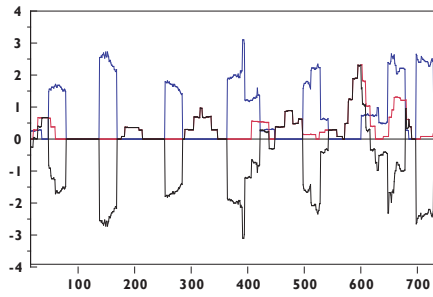

Rst1228

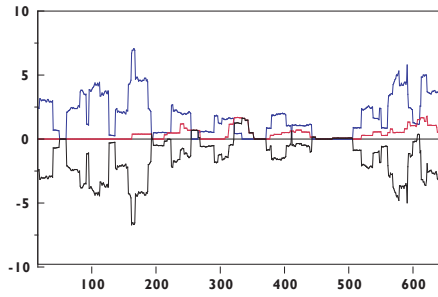

Rst1585

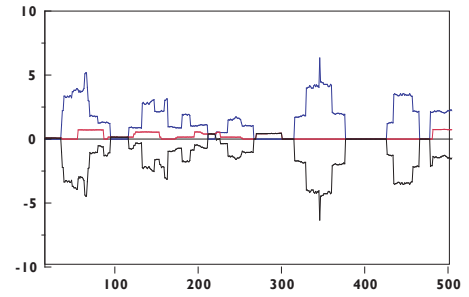

Codon position
