# Supplementary material
Source: PubMed Central journal article supplement (PMC34706)
Supplement: pnas_98_13_7552__4.pdf [file pnas_98_13_7552__4.pdf]

**Table 4. Western immunoblot analysis of expressed recombinant proteins**

| SPy No. <sup>a</sup> | Putative function <sup>b</sup>                                                     | Healthy human subject sera <sup>c</sup> |    |    |    |    |    |     | Human sera (invasive episodes) <sup>d</sup><br>(Convalescent-phase) |      |      |      |
|----------------------|------------------------------------------------------------------------------------|-----------------------------------------|----|----|----|----|----|-----|---------------------------------------------------------------------|------|------|------|
|                      |                                                                                    | 28                                      | 31 | 51 | 75 | 86 | 89 | 104 | 8004                                                                | 8117 | 8271 | 8493 |
| 2211                 | Transmembrane protein Tmp5                                                         | -                                       | -  | -  | -  | -  | -  | -   | -                                                                   | -    | -    | -    |
| 1972                 | Pullulanase                                                                        | +                                       | +  | +  | +  | +  | +  | +   | +                                                                   | +    | +    | +    |
| 1858                 | XAA-PRO dipeptidyl peptidase                                                       | +                                       | +  | +  | +  | +  | -  | +   | +                                                                   | -    | -    | -    |
| 1857                 | Catabolite gene activator and regulatory subunit of cAMP-dependent protein kinases | -                                       | -  | -  | -  | -  | -  | -   | -                                                                   | -    | -    | -    |
| 1361                 | Internalin homolog                                                                 | +                                       | +  | +  | +  | +  | +  | +   | -                                                                   | +    | +    | +    |
| 1239                 | Aminopeptidase N                                                                   | -                                       | -  | +  | -  | +  | -  | -   | +                                                                   | -    | -    | -    |
| 0872                 | 2',3'-cyclic-nucleotide 2'-phosphodiesterase                                       | -                                       | -  | +  | -  | +  | -  | -   | -                                                                   | +    | -    | -    |
| 0843                 | Cell surface protein <sup>e</sup>                                                  | +                                       | +  | +  | +  | +  | +  | +   | +                                                                   | +    | +    | +    |
| 0747                 | Extracellular nuclease                                                             | +                                       | -  | +  | -  | +  | +  | +   | -                                                                   | -    | +    | +    |
| 0277                 | Amino acid ABC transporter permease component                                      | -                                       | -  | +  | -  | -  | -  | -   | -                                                                   | -    | +    | -    |

<sup>a</sup>The corresponding numerical identifier of each ORF as listed in GenBank.

<sup>b</sup>As determined by WIT2 or BLAST analysis.

<sup>c</sup>Sera isolated from humans with no known history of invasive GAS infection. Number is arbitrary designation of the human subject.

<sup>d</sup>Convalescent sera was obtained greater than 3 weeks after infection onset. Number is arbitrary designation of the patient.

<sup>e</sup>BLAST results indicate homology to a cell surface antigen of *Bacteroides forsythus* (GenBank: T31094), a choline-binding protein of *Streptococcus pneumoniae* (GenBank: CAB04758), and internalin B of *Listeria ivanovii* (GenBank: CAC20606).
